# Supplementary material
Source: Springer Nature journal article supplement (https://www.springermedizin.de/resource/supplementary/12967_2011_790_MOESM2_ESM.pdf/9577064)

$\alpha$ -HA WSN (2G9)

$\alpha$ -A $\beta$  (20.1)

Mock

WSN-WT

WSN-A $\beta$ <sub>1-10</sub>

WSN-A $\beta$ <sub>1-7</sub>

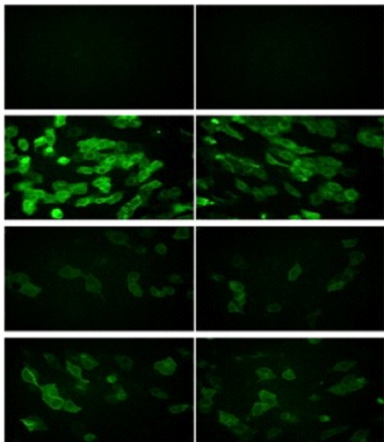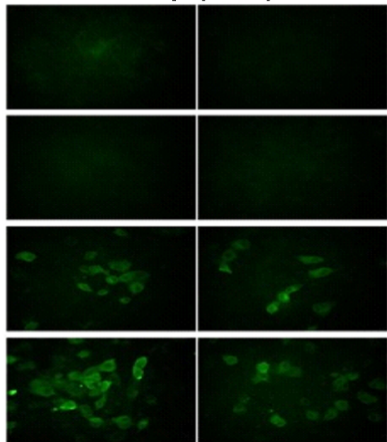

Supplement: MOESM2 [file 9577064]
